# Supplementary material
Source: publisher site journal article supplement (https://www.dovepress.com/article/529380)
Supplement: Supplementary file 1 [file 529380%20Revised%20Supplementary%20Materials.docx]

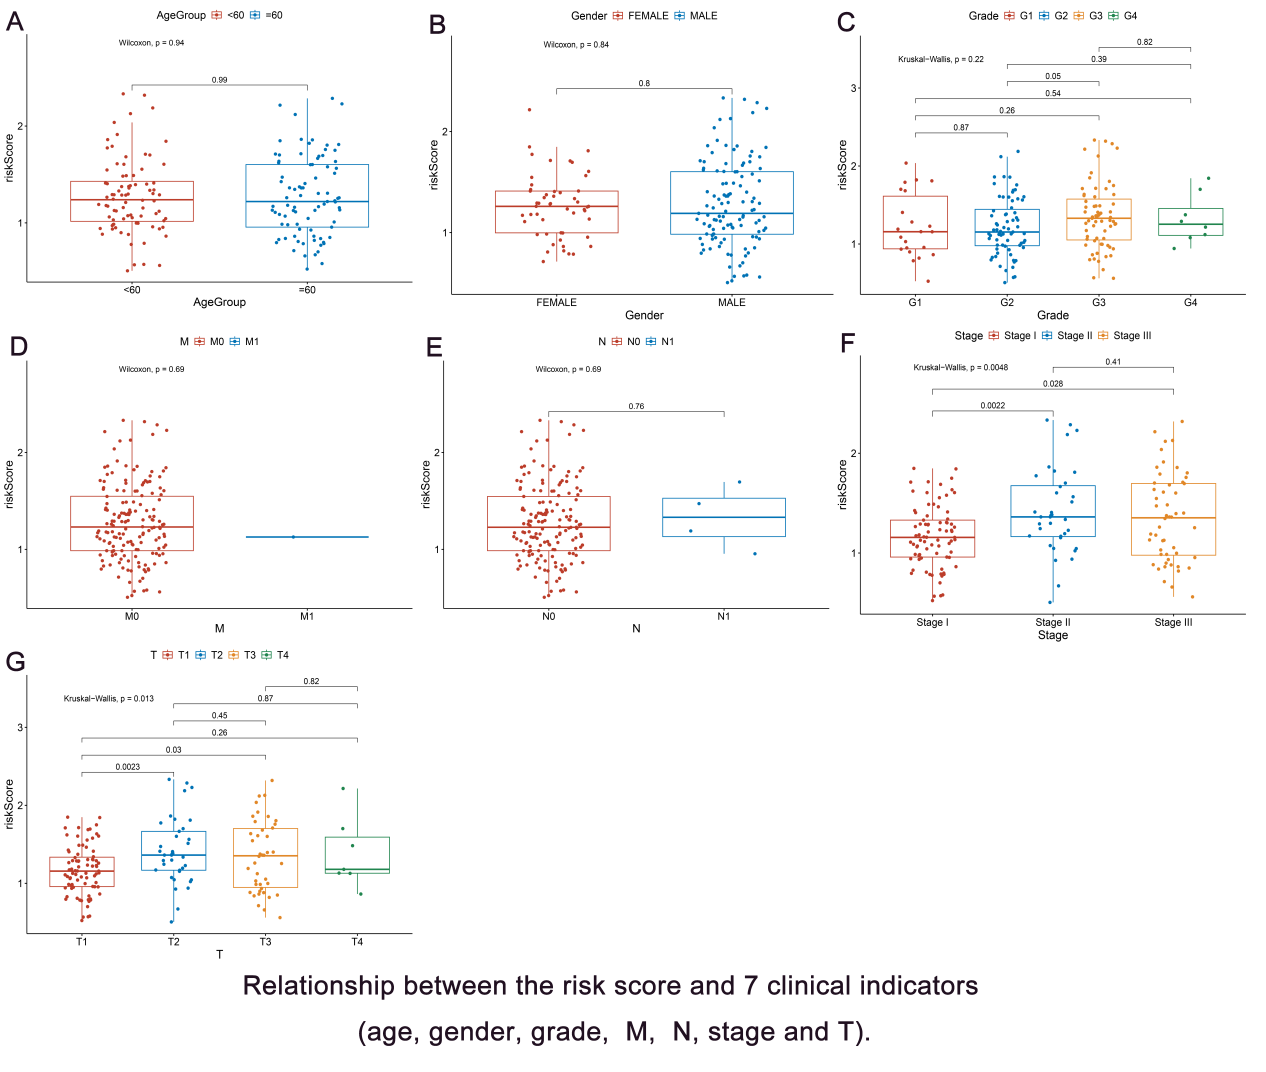


Supplementary Figure S1. Relationship between the risk score and 7 clinical indicators (age, gender, grade, M, N, stage and T).(A) The association between risk score and age. (B) The association between risk score and gender. (C) The association between risk score and grade. (D) The association between risk score and M stage. (E) The association between risk score and N stage. (F) The association between risk score and stage.(G) The association between risk score and T stage.

Supplementary Table 1. GEPIA database-derived associations analysis between G6PD and cellular immune-associated markers (correlation coefficient: Spearman)

| Immune cell | Biomarker | R value | P value |
| --- | --- | --- | --- |
| B cell | CD19 | 0.27a | 8.9E-08***a |
|  | CD79A | 0.18a | 0.00054***a |
| CD8+T cell | CD8A | 0.24a | 4.8E-06***a |
|  | CD8B | 0.24a | 3.1E-06***a |
| CD4+T cell | CD4 | 0.24a | 3.8E-06***a |
| Macrophage | CD68 | 0.43a | 2.7E-18***a |
|  | MARCO | 0.14a | 0.0059**a |
| M1 macrophage | NOS2 | 0.0037 | 0.94 |
|  | IRF5 | 0.37a | 1.1E-13***a |
|  | PTGS2 | 0.2a | 8.4E-05***a |
| M2 macrophage | CD163 | 0.23a | 1.3E-05***a |
|  | VSIG4 | 0.32a | 2.3E-10***a |
|  | MS4A4A | 0.29a | 1.9E-08***a |
| Neutrophil | CEACAM8 | 0.081 | 0.12 |
|  | ITGAM | 0.52a | 7.1E-27***a |
|  | CCR7 | 0.14a | 0.0093**a |
| Dendritic cell | HLA-DPB1 | 0.34a | 2.9E-11***a |
|  | HLA-DQB1 | 0.17a | 0.00083***a |
|  | HLA-DRA | 0.35a | 4.3E-12***a |
|  | HLA-DPA1 | 0.33a | 6E-11***a |
|  | CD1C | 0.18a | 0.00048***a |
|  | NRP1 | 0.34a | 2.6E-11***a |
|  | ITGAX | 0.46a | 1.9E-20***a |

aThese results are statistically significant.

**p value<0.01, ***p value<0.001.
